# Supplementary material
Source: PubMed Central journal article supplement (PMC7264508)
Supplement: JMV-92-1807-s001.pdf [file JMV-92-1807-s001.pdf]

**Supplementary Table 2 Laboratory results of the two patients infected with  
SARS-CoV-2 on Feb 19, 2020**

| Indicators/patients | Patient 1 | Patient 2 | Reference |
|---------------------|-----------|-----------|-----------|
| IgG                 | 6.989     | 5.043     | <1.0      |
| IgM                 | 0.716     | 13.638    | <1.0      |
