# Supplementary material
Source: PubMed Central journal article supplement (PMC7264508)
Supplement: JMV-92-1807-s002.pdf [file JMV-92-1807-s002.pdf]

**Supplementary Table 1 Laboratory results of the three patients infected with  
SARS-CoV-2 on admission to hospital**

| Indicators/patients                     | Patient 1      | Patient 2       | Patient 3       |
|-----------------------------------------|----------------|-----------------|-----------------|
| White blood cell count, $\times 10^9/L$ | 7.61 (3.5-9.5) | 4.37 (3.5-9.5)  | 3.40 (3.5-9.5)  |
| Neutrophil count, $\times 10^9/L$       | 4.21 (1.8-6.3) | 3.62 (1.8-6.3)  | 2.49 (1.8-6.3)  |
| Neutrophil percent, %                   | 55.30 (40-75)  | 82.50 (40-75)   | 72.80 (40-75)   |
| Lymphocyte count, $\times 10^9/L$       | 2.73 (1.1-3.2) | 0.51 (1.1-3.2)  | 0.75 (1.1-3.2)  |
| Lymphocyte percent, %                   | 35.90 (20-50)  | 11.80 (20-50)   | 22.20 (20-50)   |
| Platelet count, $\times 10^9/L$         | 305 (125-350)  | 176 (125-350)   | 110 (125-350)   |
| Haemoglobin, g/L                        | 132 (115-150)  | 151 (130-175)   | 100 (115-150)   |
| Procalcitonin, ng/mL                    | -              | 0.118 (0-0.046) | 0.024 (0-0.046) |
