# Supplementary material
Source: PubMed Central journal article supplement (PMC7264508)

Supplementary Figure 1 Chest CT images of Patient 1

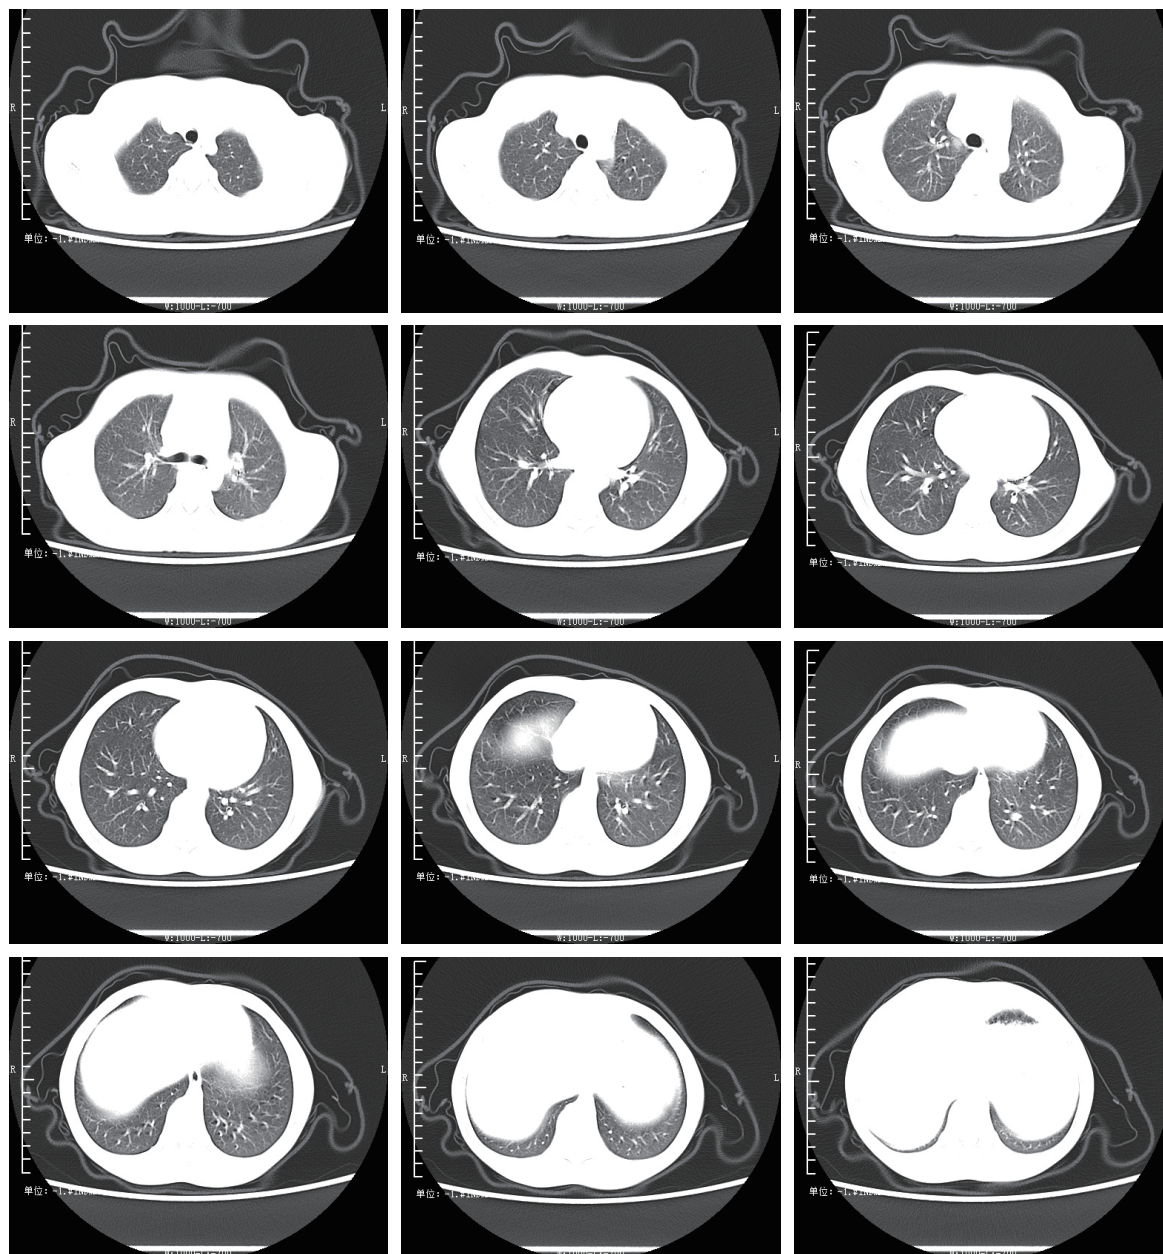

Supplement: JMV-92-1807-s003.pdf [file JMV-92-1807-s003.pdf]
